# Supplementary material for: Tunable Wettability of Biodegradable Multilayer Sandwich-Structured Electrospun Nanofibrous Membranes
Source: PubMed Central journal article supplement (PMC7569968; doi:10.3390/polym12092092), 2020-09-15
Supplement: polymers-12-02092-s001.pdf [file polymers-12-02092-s001.pdf]

# Tunable wettability of biodegradable multilayer sandwich-structured electrospun nanofibrous membranes

AKM Mashud Alam, Elena Ewaldz, Chunhui Xiang\*, Wangda Qu and Xianglan Bai

## Supporting Information

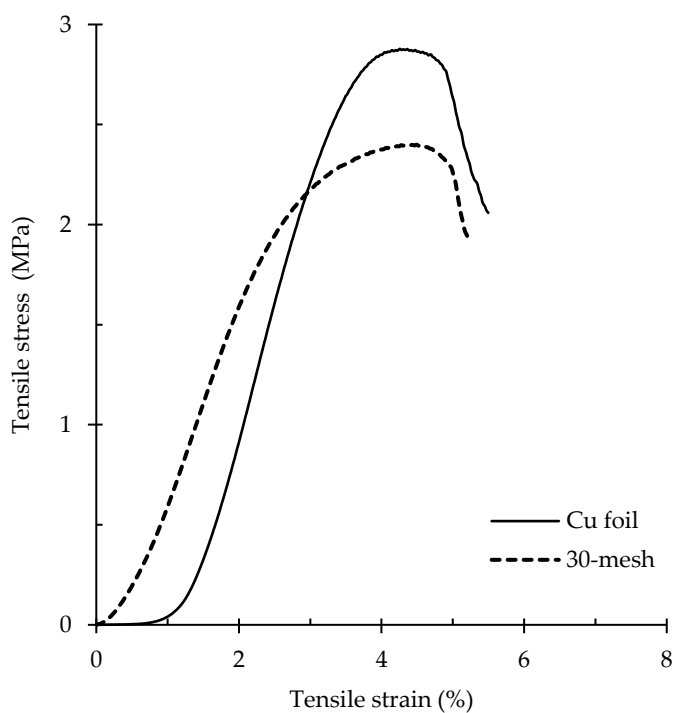

**Figure S1.** Stress-strain curve of the 2-layers (RC-PLA) ENF structures

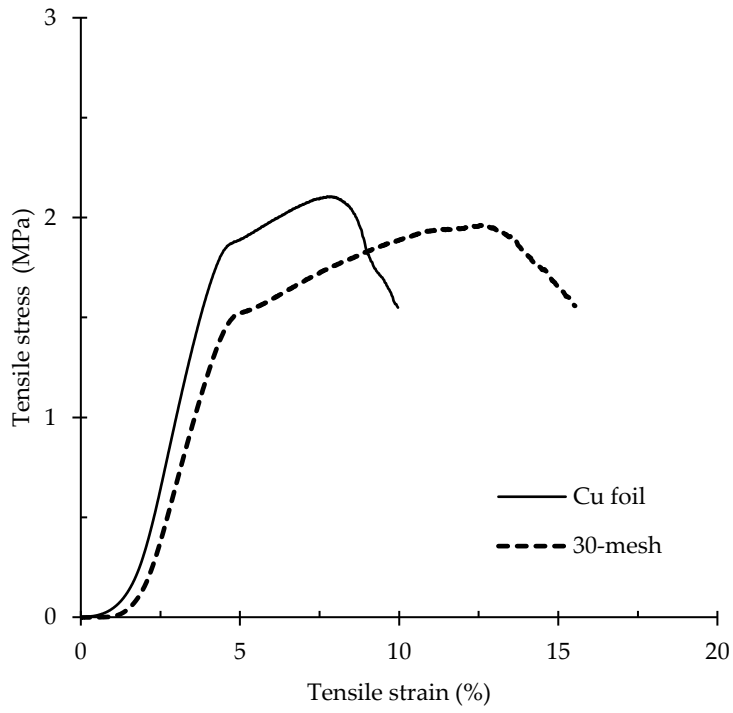

**Figure S2.** Stress-strain curve of the PLA based 3-layers (PLA-RC-PLA) ENF structures

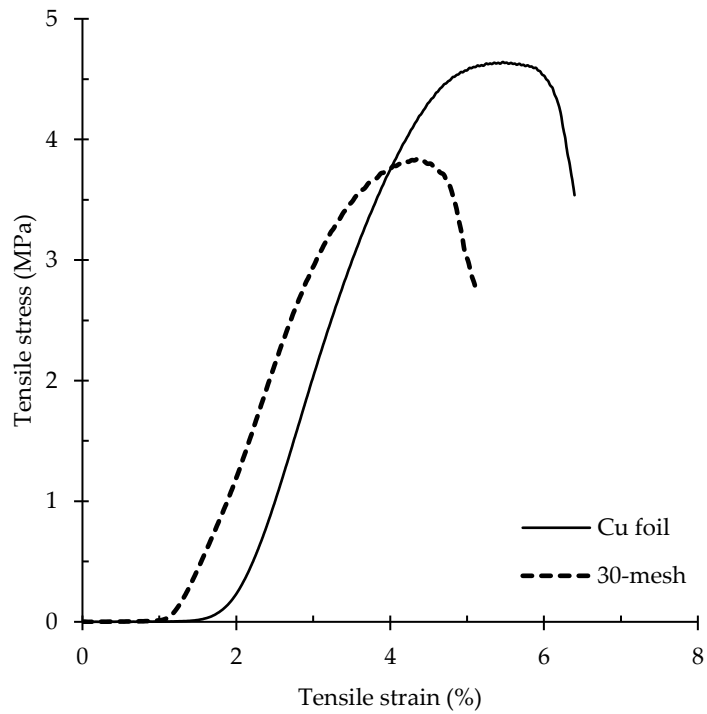

**Figure S3.** Stress-strain curve of the RC based 3-layers (RC-PLA-RC) ENF structures
